# Supplementary material for: 3D Printing Technologies in Biosensors Production: Recent Developments
Source: MDPI journal article supplement (doi:10.3390/chemosensors10020065), 2022-02-07
Supplement: s1 [file s1]

# 3D Printing Technologies in Biosensors Production: Recent Developments

Giulia Remaggi, Alessandro Zaccarelli and Lisa Elviri \*

Food and Drug Department, University of Parma, Parco Area delle Scienze 27/a, 43124 Parma, Italy;

giulia.remaggi@unipr.it (G.R.); Alessandro.zaccarelli@studenti.unipr.it (A.Z.)

\* Correspondence: Lisa.Elviri@unipr.it; Tel.: +39-0521-905087

**Table S1.** List of abbreviations related to 3D printed technologies and materials listed in Table 1 of the manuscript.

| Abbreviation             | Full Expansion                                                       | 3D printing technologies                     |
|--------------------------|----------------------------------------------------------------------|----------------------------------------------|
| PLA                      | Polylactic acid                                                      | Fused Deposition Modeling                    |
| TPU                      | Thermoplastic polyurethane                                           |                                              |
| PP                       | Polypropylene                                                        | FDM, Drop on Demand                          |
| AgNPs/SU-8               | Silver-nanoparticles/Epoxy-based negative photoresist                | Inkjet printing                              |
| PDMS                     | Polydimethylsiloxane                                                 | Aerosol Jet Printing, Stereolithography      |
| CNT/CB                   | Carbon nanotube/Carbon black                                         | Fused Deposition Modeling                    |
| PEGDA                    | Polyethylene glycol diacrylate                                       | Digital Light Processing, Stereolithography  |
| ABS                      | Acrylonitrile butadiene styrene                                      | Stereolithography, Fused Deposition Modeling |
| PI                       | Polyimide plastic                                                    | Drop on Demand                               |
| CuMPs-polyethylene oxide | Copper microparticles                                                | Direct Ink Writing                           |
| Au/pHEMA                 | Gold/ poly(2-hydroxyethyl methacrylate)                              | Vat photopolymerization                      |
| rGO-TEPA/PB              | Reduced graphene oxide-tetraethylene pentamine                       | Vat photopolymerization                      |
| PU                       | Polyurethane                                                         | Digital Light Processing                     |
| pAMPSA                   | Poly-2-Acrylamido-2-methyl-1-propanesulfonic acid                    | Stereolithography                            |
| PMMA                     | Poly(methyl methacrylate)                                            | Material Jetting                             |
| PEDOT:PSS                | Poly(3,4-ethylenedioxythiophene):polystyrene sulfonate               | Inkjet printing                              |
| p(HEMA-co-EGMA)          | Poly(2-hydroxyethyl methacrylate-co-polyethyleneglycol methacrylate) | Inkjet printing                              |
